# Supplementary material for: Gene-microarray analysis of multiple sclerosis lesions yields new targets validated in autoimmune encephalomyelitis
Source: Springer Nature journal article supplement (doi:10.1038/nm0502-500), 2002-05-01
Supplement: 41591_2002_BFnm0502500_MOESM1_ESM.pdf [file 41591_2002_BFnm0502500_MOESM1_ESM.pdf]

| Accession                                 | Unigene   | Symbol   | Entrez Definition                                                              | Sample |      |      |      | Mean MS | p-value  |
|-------------------------------------------|-----------|----------|--------------------------------------------------------------------------------|--------|------|------|------|---------|----------|
|                                           |           |          |                                                                                | MS-1   | MS-2 | MS-3 | MS-4 |         |          |
| <b>Adhesion / matrix</b>                  |           |          |                                                                                |        |      |      |      |         |          |
| None                                      |           |          |                                                                                |        |      |      |      |         |          |
| <b>Cell cycle / growth / apoptosis</b>    |           |          |                                                                                |        |      |      |      |         |          |
| X78342                                    | Hs.77313  | CDK10    | PISSLRE (cyclin-dependent kinase 10) mRNA                                      | 13.6   | 1.0  | 3.0  | 3.6  | 5.3     | 0.08     |
| M62403                                    | Hs.1516   | IGFBP4   | <b>Insulin-like growth factor binding protein 4 (IGFBP4) mRNA</b>              | 4.2    | 6.1  | 3.6  | 4.4  | 4.6     | 0.000061 |
| J04164                                    | Hs.146360 | IFI17    | Interferon-inducible protein 27-Sep mRNA                                       | 6.0    | 6.5  | 2.1  | 1.9  | 4.1     | 0.000712 |
| M80563                                    | Hs.81256  | S100A4   | CAPL protein mRNA                                                              | 2.3    | 6.5  | 0.9  | 2.4  | 3.0     | 0.06     |
| M35878                                    | Hs.77326  | IGFBP3   | <b>Insulin-like growth factor-binding protein-3 gene</b>                       | 4.1    | 2.2  | 2.7  | 2.4  | 2.8     | 0.00399  |
| X74262                                    | Hs.16003  | RBBP4    | RbAp48 mRNA encoding retinoblastoma binding protein                            | 4.4    | 2.4  | 1.8  | 2.3  | 2.7     | 0.00187  |
| <b>Cell metabolism</b>                    |           |          |                                                                                |        |      |      |      |         |          |
| M83651                                    | Hs.159481 | GALGT    | $\beta$ -1,4 N-acetylgalactosaminyltransferase mRNA                            | 7.6    | 9.4  | 1.0  | 4.8  | 5.7     |          |
| U89606                                    | Hs.38041  | PDXK     | <b>Pyridoxal kinase mRNA</b>                                                   | 8.9    | 2.2  | 4.7  | 5.2  | 5.3     |          |
| X14008                                    | Hs.234734 | LYZ      | <b>Lysozyme gene (EC 3.2.1.17)</b>                                             | 4.3    | 8.0  | 3.5  | 3.3  | 4.8     | 0.01     |
| D42073                                    | Hs.167791 | RCN1     | <b>mRNA for reticulocalbin</b>                                                 | 7.2    | 4.2  | 2.6  | 4.4  | 4.6     | 0.000741 |
| S90469                                    | Hs.167246 | PCP      | Cytochrome P450 reductase                                                      | 4.5    | 6.6  | 6.3  | 1.0  | 4.6     |          |
| U49352                                    | Hs.81548  | DECOR    | Liver 2,4-dienoyl-CoA reductase mRNA                                           | 3.8    | 5.1  | 4.7  | 1.1  | 3.6     | 0.1      |
| D10704                                    | Hs.77221  | CHK      | <b>mRNA for choline kinase</b>                                                 | 5.5    | 2.1  | 2.9  | 2.8  | 3.3     | 0.00373  |
| M19045                                    | Hs.234734 | LYZ      | Lysozyme mRNA                                                                  | 3.3    | 4.4  | 1.8  | 2.1  | 2.9     | 0.000187 |
| U46689                                    | Hs.159608 | ALDH10   | <b>Microsomal aldehyde dehydrogenase (ALD10) mRNA</b>                          | 2.0    | 2.8  | 3.7  | 2.5  | 2.8     |          |
| M69177                                    | Hs.82163  | MAOB     | <b>Monoamine oxidase B (MAOB) mRNA</b>                                         | 3.9    | 2.2  | 2.3  | 2.7  | 2.8     | 0.05     |
| L41668                                    | Hs.198245 | GALE     | UDP-Galactose 4 epimerase (GALE) gene                                          | 4.7    | 0.7  | 3.0  | 2.1  | 2.6     | 0.01     |
| M88468                                    | Hs.75138  | MVK      | Mevalonate kinase mRNA                                                         | 2.4    | 2.0  | 0.7  | 4.8  | 2.5     |          |
| U52852                                    | Hs.142    | SULT1A1  | Sulfotransferase, Phenol-Preferring                                            | 2.9    | 2.0  | 2.8  | 1.6  | 2.3     |          |
| M55150                                    | Hs.73875  | FAH      | Fumarylacetoacetate hydrolase mRNA                                             | 2.0    | 1.7  | 2.4  | 2.1  | 2.0     | 0.02     |
| <b>Cell structure</b>                     |           |          |                                                                                |        |      |      |      |         |          |
| U84540                                    | Hs.54435  | DTNA     | <b>Dystrobrevin isoform DTN-3 (DTN) gene</b>                                   | 16.8   | 17.0 | 2.9  | 3.0  | 9.9     | 0.00704  |
| X53416                                    | Hs.195464 | FLNA     | <b>mRNA for actin-binding protein (filamin) (ABP-280)</b>                      | 7.5    | 5.4  | 4.1  | 4.9  | 5.5     |          |
| U14588                                    | Hs.102497 | PXN      | Paxillin mRNA                                                                  | 5.6    | 9.1  | 1.1  | 4.3  | 5.0     | 0.04     |
| X05610                                    | Hs.75617  | COL4A2   | mRNA for type IV collagen $\alpha$ -2 chain                                    | 5.7    | 1.2  | 6.1  | 5.8  | 4.7     | 0.01     |
| Z19574                                    | Hs.2785   | KRT17    | Gene for cytokeratin 17                                                        | 5.1    | 3.5  | 5.8  | 1.0  | 3.8     | 0.04     |
| U52426                                    | Hs.74597  | STIM1    | GOK (GOK) mRNA                                                                 | 1.8    | 3.0  | 2.9  | 3.3  | 2.8     |          |
| X69089                                    | Hs.79227  | MYOM2    | mRNA for skeletal muscle 165kDa protein                                        | 5.5    | 0.7  | 2.1  | 2.3  | 2.6     | 0.04     |
| X87838                                    | Hs.171271 | CTNNB1   | mRNA for $\beta$ -catenin                                                      | 2.8    | 3.0  | 1.8  | 3.0  | 2.6     | 0.09     |
| S40719                                    | Hs.1447   | GFAP     | Glial fibrillary acidic protein                                                | 2.6    | 2.5  | 1.5  | 2.5  | 2.3     | 0.0001   |
| M31013                                    | Hs.146550 | MYH9     | Nonmuscle myosin heavy chain (NMHC) mRNA                                       | 2.3    | 2.9  | 2.1  | 0.8  | 2.0     | 0.01     |
| L13923                                    | Hs.750    | FBN1     | Fibrillin mRNA                                                                 | 2.2    | 2.7  | 0.7  | 2.4  | 2.0     | 0.01     |
| <b>Cell surface molecules / receptors</b> |           |          |                                                                                |        |      |      |      |         |          |
| X03363                                    | Hs.173664 | ERBB2    | <b>c-erb-B-2 mRNA</b>                                                          | 5.0    | 7.6  | 3.0  | 2.7  | 4.6     | 0.19     |
| S60415                                    | Hs.30941  | CACNB2   | <b>myasthenic syndrome antigen B</b>                                           | 4.9    | 3.4  | 5.4  | 3.0  | 4.2     | 0.08     |
| X85116                                    | Hs.160483 | EPB72    | <b>Epb72 gene</b>                                                              | 5.3    | 4.3  | 2.4  | 3.3  | 3.9     | 0.17     |
| U66661                                    | Hs.22785  | GABRE    | GABA-A receptor $\epsilon$ subunit mRNA                                        | 3.9    | 3.9  | 1.2  | 3.7  | 3.2     |          |
| L21954                                    | Hs.202    | EZFP     | <b>Peripheral benzodiazepine receptor gene</b>                                 | 4.3    | 2.3  | 3.0  | 3.0  | 3.2     | 0.02     |
| AC000061                                  | Hs.663    | ABCC7    | WUGSC:H_133K23.1c gene from BAC clone 133K23                                   | 2.9    | 2.8  | 1.0  | 3.7  | 2.6     |          |
| <b>Immune related</b>                     |           |          |                                                                                |        |      |      |      |         |          |
| M87789                                    | Hs.140    | IGHG3    | Anti-hepatitis A IgG                                                           | 55.1   | 1.3  | 46.9 | 7.6  | 27.7    | 0.02     |
| X62744                                    | Hs.77522  | HLA-DMA  | RING6 mRNA for HLA class II $\alpha$ chain-like product                        | 13.3   | 1.0  | 3.1  | 6.7  | 6.0     |          |
| J04080                                    | Hs.169756 | C1S      | <b>Complement component C1r mRNA</b>                                           | 5.8    | 5.7  | 3.7  | 6.0  | 5.3     | 0.00846  |
| Y08374                                    | Hs.75184  | CHI3L1   | <b>GP-39 cartilage protein gene</b>                                            | 7.5    | 4.6  | 2.6  | 4.1  | 4.7     | 0.01     |
| L13197                                    | Hs.75874  | PAPPA    | Pregnancy-associated plasma protein A (PAPP-A) gene                            | 5.0    | 4.2  | 1.0  | 7.5  | 4.4     |          |
| M27492                                    | Hs.82112  | IL1R1    | Interleukin 1 receptor mRNA                                                    | 3.8    | 10.1 | 2.5  | 0.7  | 4.3     | 0.14     |
| M31525                                    | Hs.72930  | HLA-DNA  | MHC class II lymphocyte antigen (HLA-DNA) gene                                 | 3.4    | 7.6  | 0.5  | 4.6  | 4.0     | 0.00488  |
| U32659                                    | Hs.41724  | IL17     | IL-17 mRNA                                                                     | 3.6    | 4.7  | 0.9  | 5.5  | 3.7     |          |
| M32315                                    | Hs.257282 | TNFRSF1B | <b>Tumor necrosis factor receptor mRNA</b>                                     | 3.4    | 2.3  | 2.7  | 4.2  | 3.1     | 0.05     |
| M94345                                    | Hs.82422  | CAPG     | Macrophage capping protein mRNA                                                | 4.9    | 1.5  | 2.1  | 3.6  | 3.0     | 0.11     |
| U32324                                    | Hs.64310  | IL11RA   | Interleukin-11 receptor $\alpha$ chain mRNA                                    | 2.7    | 0.9  | 2.2  | 3.5  | 2.3     | 0.15     |
| M84349                                    | Hs.119663 | CD59     | Transmembrane protein (CD59) gene                                              | 2.3    | 2.2  | 2.2  | 1.3  | 2.0     | 0.01     |
| <b>Myelin related</b>                     |           |          |                                                                                |        |      |      |      |         |          |
| None                                      |           |          |                                                                                |        |      |      |      |         |          |
| <b>Proteases and inhibitors</b>           |           |          |                                                                                |        |      |      |      |         |          |
| X68733                                    | Hs.234726 | AACT     | $\alpha$ 1-antichymotrypsin                                                    | 7.1    | 24.2 | 3.4  | 12.2 | 11.7    | 0.000147 |
| M27826                                    | Hs.238380 | ~        | <b>Endogenous retroviral protease mRNA</b>                                     | 7.5    | 6.2  | 2.2  | 6.5  | 5.6     | 0.000106 |
| X02750                                    | Hs.2351   | PROC     | <b>Liver mRNA for protein C</b>                                                | 2.4    | 3.4  | 3.2  | 5.9  | 3.7     | 0.04     |
| U58048                                    | ~         | PRSM1    | Metalloproteinase PRSM1 mRNA                                                   | 3.5    | 3.1  | 1.9  | 3.1  | 2.9     | 0.01     |
| M13143                                    | Hs.1901   | KLKB1    | Plasma prekallikrein                                                           | 3.3    | 2.8  | 1.4  | 2.1  | 2.4     |          |
| S69272                                    | Hs.41072  | PI6      | cytoplasmic antiproteinase, 38 kDa intracellular serine proteinase inhibitor   | 2.2    | 2.9  | 1.5  | 2.2  | 2.2     | 0.06     |
| <b>Secreted products</b>                  |           |          |                                                                                |        |      |      |      |         |          |
| D14874                                    | Hs.394    | ADM      | Adrenomedullin                                                                 | 6.8    | 9.0  | 1.9  | 11.2 | 7.2     | 0.00376  |
| <b>Signaling</b>                          |           |          |                                                                                |        |      |      |      |         |          |
| M83667                                    | Hs.76722  | CEBPD    | <b>NF-IL6-<math>\beta</math> protein mRNA</b>                                  | 3.6    | 12.9 | 5.3  | 3.8  | 6.4     | 0.000048 |
| M57730                                    | Hs.1624   | EFNA1    | <b>B61 mRNA</b>                                                                | 5.0    | 6.9  | 2.6  | 10.4 | 6.2     | 0.000738 |
| L35263                                    | Hs.79107  | MAPK14   | <b>CSAids binding protein (CSBP1) mRNA</b>                                     | 5.9    | 5.8  | 4.9  | 6.7  | 5.8     | 0.08     |
| Z74792                                    | Hs.168157 | ~        | <b>mRNA for CCAAT transcription binding factor subunit <math>\gamma</math></b> | 5.3    | 3.4  | 4.7  | 6.3  | 4.9     | 0.000035 |
| U59914                                    | Hs.153863 | MADH6    | <b>Chromosome 15 Mad homolog Smad6 mRNA</b>                                    | 4.5    | 7.0  | 3.9  | 2.8  | 4.6     |          |

|                              |           |          |                                                                          |      |      |     |     |     |          |  |
|------------------------------|-----------|----------|--------------------------------------------------------------------------|------|------|-----|-----|-----|----------|--|
| S59049                       | Hs.75256  | RGS1     | BL34, B cell activation gene                                             | 3.3  | 1.8  | 6.3 | 3.8 | 3.8 | 0.000678 |  |
| U73377                       | Hs.81972  | SHC1     | p66shc (SHC) mRNA                                                        | 3.7  | 5.7  | 3.1 | 1.9 | 3.6 | 0.08     |  |
| U27655                       | Hs.82294  | RGS3     | RGP3 mRNA                                                                | 5.8  | 4.9  | 3.0 | 0.6 | 3.6 | 0.000504 |  |
| Z56281                       | Hs.75254  | IRF3     | mRNA for interferon regulatory factor 3                                  | 3.1  | 4.0  | 1.6 | 5.5 | 3.5 |          |  |
| U18919                       | Hs.74130  | ~        | Chromosome 17q12-21 mRNA, clone pOV-2                                    | 2.6  | 1.6  | 4.6 | 5.4 | 3.5 | 0.08     |  |
| U16031                       | Hs.181015 | ~        | Transcription factor IL-4 Stat mRNA                                      | 2.8  | 1.0  | 6.4 | 3.4 | 3.4 |          |  |
| M95678                       | Hs.994    | PLCB2    | Phospholipase C- $\beta$ -2 mRNA                                         | 4.4  | 4.0  | 1.1 | 2.3 | 2.9 | 0.00801  |  |
| U49020                       | Hs.182280 | MEF2A    | MEF2A gene (myocyte-specific enhancer factor 2A, C9 form)                | 3.3  | 2.5  | 1.6 | 3.6 | 2.8 |          |  |
| U09477                       | Hs.170263 | TP53BP1  | Clone 53BP1 p53-binding protein mRNA                                     | 1.7  | 3.4  | 3.2 | 2.5 | 2.7 | 0.05     |  |
| U08023                       | Hs.78941  | MERTK    | Cellular proto-oncogene (c-mer) mRNA                                     | 1.9  | 2.0  | 3.7 | 2.9 | 2.6 |          |  |
| U31384                       | Hs.83381  | GNG11    | G protein $\gamma$ -11 subunit mRNA                                      | 1.8  | 2.2  | 2.5 | 3.1 | 2.4 | 0.02     |  |
| U12535                       | Hs.2132   | EPS8     | Epidermal growth factor receptor kinase substrate (Eps8) mRNA            | 2.2  | 4.0  | 0.9 | 2.3 | 2.4 |          |  |
| X02596                       | Hs.234799 | BCR      | mRNA for bcr (breakpoint cluster region) gene in Philadelphia chromosome | 3.2  | 1.7  | 2.6 | 2.8 | 2.6 |          |  |
| U07223                       | Hs.178502 | CHN2     | $\beta$ 2-chimaerin mRNA                                                 | 2.0  | 1.0  | 3.2 | 2.4 | 2.1 | 0.04     |  |
| X16663                       | Hs.14601  | HCLS1    | HS1 gene for hematopoietic lineage cell specific protein                 | 1.7  | 2.6  | 2.2 | 2.1 | 2.1 |          |  |
| <b>Stress</b>                |           |          |                                                                          |      |      |     |     |     |          |  |
| Z23090                       | Hs.76067  | HSPB1    | mRNA for 28 kDa heat shock protein                                       | 3.2  | 18.8 | 2.7 | 1.7 | 6.6 | 0.01     |  |
| X6717                        | Hs.94360  | MT1L     | <b>MT-11 mRNA</b>                                                        | 4.5  | 3.4  | 2.2 | 6.2 | 4.1 | 0.000003 |  |
| X64177                       | Hs.2667   | MT1H     | <b>mRNA for metallothionein</b>                                          | 8.4  | 2.2  | 2.7 | 3.0 | 4.1 | 0.00783  |  |
| M10943                       | Hs.203936 | MT1F     | Metallothionein-II gene (hMT-II)                                         | 6.0  | 3.9  | 3.2 | 1.1 | 3.6 | 0.0043   |  |
| X63368                       | Hs.77768  | HSJ1     | Dnaj Homolog (Gb:X63368)                                                 | 1.9  | 5.8  | 2.1 | 2.5 | 3.1 | 0.0047   |  |
| M64673                       | Hs.1499   | HSF1     | Heat shock factor 1 (TCF5) mRNA                                          | 2.5  | 5.2  | 2.5 | 0.9 | 2.8 |          |  |
| <b>Transcription</b>         |           |          |                                                                          |      |      |     |     |     |          |  |
| X66975                       | Hs.172550 | PTB      | <b>Heterogeneous Nuclear Ribonucleoprotein I</b>                         | 7.0  | 3.2  | 2.4 | 9.5 | 5.5 |          |  |
| S38742                       | Hs.89583  | HOX11    | HOX11 homeodomain (homeobox)                                             | 8.6  | 5.9  | 1.0 | 4.4 | 5.0 | 0.02     |  |
| D38524                       | Hs.138593 | ~        | mRNA for 5'-nucleotidase                                                 | 7.0  | 3.8  | 1.0 | 3.8 | 3.9 | 0.00216  |  |
| X85373                       | Hs.77496  | SNRPG    | <b>mRNA for Sm protein G</b>                                             | 2.7  | 2.4  | 3.8 | 6.6 | 3.9 |          |  |
| L12579                       | Hs.147049 | CUTL1    | Ccaat Displacement Protein, Cut Homolog                                  | 4.7  | 4.8  | 1.3 | 3.2 | 3.5 |          |  |
| U21090                       | Hs.74598  | POLD2    | DNA polymerase $\delta$ small subunit mRNA                               | 6.2  | 2.1  | 2.4 | 1.9 | 3.2 |          |  |
| S80343                       | Hs.180832 | RARS     | ArgRS, arginyl-tRNA synthetase                                           | 2.9  | 1.6  | 3.7 | 4.3 | 3.1 |          |  |
| U23028                       | Hs.2437   | EIF2B5   | <b>Human eukaryotic initiation factor 2B-e mRNA</b>                      | 3.0  | 2.1  | 2.1 | 4.1 | 2.8 |          |  |
| D26018                       | Hs.82502  | P66      | mRNA for KIAA0039 gene                                                   | 3.0  | 3.1  | 1.5 | 3.6 | 2.8 |          |  |
| D50405                       | Hs.88556  | HDAC1    | mRNA for RPD3 protein                                                    | 1.8  | 3.9  | 2.1 | 2.7 | 2.6 | 0.00139  |  |
| L19779                       | Hs.795    | H2AFO    | Histone H2A.2 mRNA                                                       | 3.9  | 2.7  | 1.5 | 2.2 | 2.6 | 0.0021   |  |
| U53209                       | Hs.119523 | ~        | Transformer-2 $\alpha$ (htra-2 $\alpha$ ) mRNA                           | 2.4  | 2.9  | 1.9 | 2.6 | 2.5 | 0.02     |  |
| U69645                       | Hs.78765  | ~        | Zinc finger protein mRNA                                                 | 1.7  | 2.6  | 2.3 | 2.6 | 2.3 | 0.18     |  |
| L19067                       | Hs.75569  | RELA     | NF- $\kappa$ -B transcription factor p65 subunit mRNA                    | 2.6  | 3.2  | 0.9 | 2.4 | 2.3 | 0.00363  |  |
| U00115                       | Hs.155024 | BCL6     | Zinc-finger protein (bcl-6) mRNA                                         | 2.6  | 2.3  | 0.8 | 2.9 | 2.1 |          |  |
| <b>Transport / secretion</b> |           |          |                                                                          |      |      |     |     |     |          |  |
| U84720                       | Hs.196209 | RAE1     | mRNA export protein Rae1 (RAE1) mRNA                                     | 9.6  | 1.0  | 2.7 | 3.6 | 4.2 |          |  |
| X75593                       | Hs.151536 | RAB13    | <b>mRNA for rab 13</b>                                                   | 2.5  | 2.3  | 2.1 | 3.5 | 2.6 | 0.00433  |  |
| Y08682                       | Hs.29331  | CPT1A    | mRNA for carnitine palmitoyltransferase I type I                         | 2.4  | 2.4  | 1.2 | 3.4 | 2.3 | 0.00132  |  |
| U58970                       | Hs.76927  | TOM34    | Putative outer mitochondrial membrane 34 kDa translocase hTOM34 mRNA     | 2.2  | 2.5  | 3.1 | 1.3 | 2.3 | 0.07     |  |
| <b>Unknown</b>               |           |          |                                                                          |      |      |     |     |     |          |  |
| L27479                       | Hs.77889  | X123     | X123 mRNA, 3' end                                                        | 13.3 | 15.9 | 3.4 | 1.3 | 8.5 | 0.01     |  |
| AF000959                     | Hs.110913 | CLDN5    | <b>Transmembrane protein mRNA</b>                                        | 10.7 | 3.0  | 5.1 | 6.5 | 6.3 | 0.000244 |  |
| L26339                       | Hs.75682  | RCD-8    | <b>Autoantigen mRNA</b>                                                  | 8.9  | 3.0  | 2.4 | 5.3 | 4.9 | 0.00634  |  |
| U62317                       | Hs.150540 | ~        | <b>Hypothetical protein 384D8.7 gene</b>                                 | 6.1  | 2.0  | 3.2 | 6.4 | 4.4 |          |  |
| X92762                       | Hs.79021  | TAZ      | mRNA for tafazzins protein                                               | 4.2  | 3.3  | 1.7 | 5.7 | 3.7 | 0.02     |  |
| D38583                       | Hs.150580 | SUI1     | <b>mRNA for calgizarin</b>                                               | 2.4  | 3.1  | 3.1 | 5.4 | 3.5 |          |  |
| U03105                       | Hs.75969  | B4-2     | <b>B4-2 protein mRNA</b>                                                 | 2.7  | 2.2  | 5.7 | 3.5 | 3.5 |          |  |
| M13241                       | Hs.25960  | MYCN     | N-myc gene                                                               | 4.5  | 2.1  | 1.6 | 5.7 | 3.5 |          |  |
| M24349                       | Hs.89626  | PTH1H    | Parathyroid hormone-like protein (PLP) gene                              | 2.3  | 6.4  | 1.4 | 3.5 | 3.4 |          |  |
| L25270                       | Hs.180756 | SMCX     | <b>XE169 mRNA</b>                                                        | 4.2  | 4.5  | 2.1 | 2.6 | 3.4 | 0.01     |  |
| U81556                       | Hs.180669 | OS4      | <b>Hypothetical protein A4 mRNA</b>                                      | 2.3  | 4.0  | 2.7 | 2.7 | 2.9 | 0.12     |  |
| D50928                       | Hs.159384 | KIAA0138 | <b>mRNA for KIAA0138 gene</b>                                            | 3.3  | 2.1  | 2.6 | 3.3 | 2.8 | 0.00255  |  |
| Z24680                       | Hs.151641 | GARP     | Garp gene mRNA                                                           | 3.1  | 3.3  | 1.6 | 3.0 | 2.8 | 0.03     |  |
| D79985                       | Hs.2491   | DGCR2    | mRNA for KIAA0163 gene                                                   | 5.0  | 2.2  | 1.2 | 2.5 | 2.7 | 0.01     |  |
| U37408                       | Hs.239737 | CTBP1    | CtBP mRNA                                                                | 3.4  | 1.2  | 3.6 | 2.6 | 2.7 |          |  |
| U32331                       | Hs.4909   | RIG      | RIG mRNA                                                                 | 3.0  | 3.2  | 1.9 | 2.6 | 2.7 | 0.18     |  |
| U36922                       | ~         | ~        | Fork head domain protein (FKHR) mRNA                                     | 2.9  | 4.4  | 1.0 | 2.5 | 2.7 |          |  |
| D86966                       | Hs.79347  | KIAA0211 | mRNA for KIAA0211 gene                                                   | 2.4  | 3.4  | 1.0 | 3.9 | 2.7 |          |  |
| D86973                       | Hs.75354  | GCN1L1   | mRNA for KIAA0219 gene                                                   | 4.3  | 2.2  | 1.1 | 3.0 | 2.7 | 0.000118 |  |
| U96115                       | ~         | ~        | VW domain-containing protein WWP3 mRNA                                   | 2.2  | 2.5  | 1.3 | 4.7 | 2.7 | 0.00648  |  |
| S73591                       | Hs.179526 | VDUP1    | Brain-expressed HHCPA78 homolog                                          | 2.9  | 3.7  | 1.7 | 2.3 | 2.6 | 0.00946  |  |
| D79991                       | Hs.246898 | KIAA0169 | mRNA for KIAA0169 gene                                                   | 2.5  | 3.3  | 0.8 | 3.0 | 2.4 | 0.000139 |  |
| D50930                       | Hs.156016 | KIAA0140 | mRNA for KIAA0140 gene                                                   | 2.1  | 2.7  | 0.8 | 3.0 | 2.2 | 0.06     |  |
| M68864                       | Hs.77868  | ~        | ORF mRNA                                                                 | 3.0  | 1.0  | 2.3 | 2.3 | 2.1 |          |  |
| D87440                       | Hs.83419  | KIAA0252 | mRNA for KIAA0252 gene                                                   | 2.9  | 0.9  | 2.2 | 2.2 | 2.0 |          |  |
| U79287                       | Hs.19555  | ~        | Clone 23867 mRNA sequence                                                | 2.0  | 2.4  | 1.0 | 2.0 | 1.8 | 0.00198  |  |
