# Supplementary material for: Gene-microarray analysis of multiple sclerosis lesions yields new targets validated in autoimmune encephalomyelitis
Source: Springer Nature journal article supplement (doi:10.1038/nm0502-500), 2002-05-01
Supplement: 41591_2002_BFnm0502500_MOESM2_ESM.pdf [file 41591_2002_BFnm0502500_MOESM2_ESM.pdf]

| Accession                                 | Unigene   | Symbol  | Entrez Definition                                                          | Sample |       |      |       | Mean MS | p-value  |
|-------------------------------------------|-----------|---------|----------------------------------------------------------------------------|--------|-------|------|-------|---------|----------|
|                                           |           |         |                                                                            | MS-1   | MS-2  | MS-3 | MS-4  |         |          |
| <b>Adhesion / Matrix</b>                  |           |         |                                                                            |        |       |      |       |         |          |
| X73608                                    | Hs.93029  | SPOCK   | mRNA for testican                                                          | -25.7  | -25.7 | -4.1 | -3.4  | -6.6    | 0.1      |
| L38608                                    | Hs.10247  | ALCAM   | CD6 ligand (ALCAM) mRNA                                                    | -9.1   | -9.1  | -2.1 | -2.3  | -3.5    |          |
| D84145                                    | Hs.39913  | WS-3    | WS-3 mRNA                                                                  | -3.6   | -7.0  | 1.0  | -7.0  | -2.5    |          |
| U55258                                    | Hs.7912   | NRCAM   | hBRAVO/Nr-CAM precursor (hBRAVO/Nr-CAM) gene                               | -1.4   | -3.2  | -2.0 | -9.2  | -2.4    |          |
| M94151                                    | Hs.150917 |         | Cadherin-associated protein-related (cap-r) mRNA                           | -2.7   | -3.4  | -1.2 | -7.1  | -2.4    | 0.19     |
| M11749                                    | Hs.125359 | THY1    | Thy-1 glycoprotein gene                                                    | -5.3   | -2.3  | -1.2 | -3.6  | -2.3    | 0.19     |
| <b>Cell cycle / growth / apoptosis</b>    |           |         |                                                                            |        |       |      |       |         |          |
| U28811                                    | 78979     | GLG1    | Cysteine-rich fibroblast growth factor receptor (CFR-1) mRNA               | -20.2  | -9.2  | -4.1 | -20.2 | -8.9    | 0.06     |
| D50310                                    | Hs.79933  | CCN1    | mRNA for cyclin 1                                                          | -13.1  | -5.3  | -2.2 | -5.7  | -4.4    |          |
| U51586                                    | Hs.74562  | SIAHBP1 | Siah binding protein 1 (SiahBP1) mRNA                                      | -1.4   | -24.3 | -2.4 | -24.3 | -3.3    |          |
| U67122                                    | Hs.81424  | UBL1    | Ubiquitin-related protein SUMO-1 mRNA                                      | -9.9   | -2.9  | -1.2 | -9.9  | -3.0    |          |
| M80629                                    | Hs.155266 | CDC2L   | Cdc2-related protein kinase (CHED) mRNA                                    | -2.4   | -2.0  | -2.2 | -6.6  | -2.6    | 0.01     |
| X75091                                    | Hs.145279 | SET     | mRNA for HLA-DR associated protein II (PHAPII)                             | -4.0   | -3.8  | -1.1 | -3.7  | -2.4    |          |
| S82024                                    | Hs.90005  | SGC10   | SCG10 neuron-specific growth-associated protein/stathmin homolog           | -7.1   | -9.3  | 1.2  | -5.8  | -2.4    |          |
| U46461                                    | Hs.197989 | DVL1    | Dishvelled homolog (DVL) mRNA                                              | -5.3   | -5.3  | 1.4  | -5.3  | -2.0    |          |
| U91327                                    | Hs.6456   | CCT2    | Chromosome 12p15 BAC clone CIT987SK-99D8 complete sequence                 | -4.2   | -4.2  | 1.4  | -4.2  | -1.9    |          |
| <b>Cell metabolism</b>                    |           |         |                                                                            |        |       |      |       |         |          |
| S67325                                    | Hs.63788  | PCOB    | Propionyl CoA carboxylase $\beta$ subunit                                  | -7.4   | -4.2  | -2.9 | -7.4  | -4.7    | 0.09     |
| Y13647                                    | 119597    | SCD     | Stearoyl-Coenzyme A Desaturase                                             | -4.3   | -4.3  | -4.3 | -4.3  | -4.3    |          |
| J04444                                    | Hs.697    | CYC1    | Cytochrome c-1 gene                                                        | -5.2   | -25.6 | -1.4 | -25.6 | -4.1    |          |
| M11058                                    | Hs.11899  | HMGCR   | 3-hydroxy-3-methylglutaryl coenzyme A reductase mRNA                       | -5.2   | -5.2  | -4.7 | -2.7  | -4.1    |          |
| D16480                                    | Hs.75860  | HADHA   | mRNA for mitochondrial enoyl-CoA hydratase/3-hydroxyacyl-CoA dehydrogenase | -2.4   | -15.3 | -2.1 | -15.3 | -4.0    |          |
| AF053070                                  | Hs.7744   | NDUFV1  | NADH-Ubiquinone Oxidoreductase, 51 kDa Subunit                             | -6.2   | -9.7  | -1.4 | -9.7  | -3.7    |          |
| L42451                                    | Hs.92261  | PDK2    | Pyruvate dehydrogenase kinase isoenzyme 2 (PKD2) mRNA                      | -3.0   | -6.1  | -6.3 | -2.5  | -3.7    | 0.009076 |
| M74826                                    | Hs.170808 | GAD2    | Glutamate decarboxylase (GAD-2) mRNA                                       | -5.2   | -3.8  | -2.2 | -3.2  | -3.3    |          |
| L13329                                    | Hs.172458 | IDS     | Homo sapiens iduronate-2-sulfatase (IDS) gene                              | -6.5   | -2.6  | -1.4 | -6.5  | -2.9    | 0        |
| M19483                                    | Hs.25     | ATP5B   | ATP synthase $\beta$ subunit gene                                          | -6.0   | -4.5  | -1.3 | -3.7  | -2.8    | 0.12     |
| D78129                                    |           |         | Squalene epoxidase                                                         | -5.1   | -2.4  | -1.7 | -5.0  | -2.8    |          |
| D90228                                    | Hs.37     | ACAT1   | Cytosolic Acetoacetyl-Coenzyme A Thiolase                                  | -2.1   | -3.5  | -2.0 | -4.7  | -2.7    |          |
| M16447                                    | Hs.75438  | QDPR    | Dihydropteridine reductase (DHPR) mRNA                                     | -4.8   | -2.0  | -2.1 | -2.3  | -2.5    | 0.01     |
| U79294                                    | Hs.173717 | PPAP2B  | Phosphatidic acid phosphatase type 2b                                      | -3.5   | -2.1  | -1.5 | -3.0  | -2.3    | 0.15     |
| J04973                                    | Hs.173554 | UQCRC2  | Cytochrome bc-1 complex core protein II mRNA                               | -2.2   | -3.1  | -1.1 | -6.8  | -2.2    | 0.12     |
| D25328                                    | Hs.99910  | PFKP    | mRNA for platelet-type phosphofructokinase                                 | -5.2   | -2.0  | -1.2 | -3.0  | -2.1    | 0.01     |
| D16562                                    | Hs.155433 | ATP5C1  | mRNA for ATP synthase $\gamma$ -subunit (L-type)                           | -4.0   | -3.2  | 1.1  | -3.9  | -2.1    | 0.01     |
| M22760                                    | Hs.181028 | COX5A   | Nuclear-encoded mitochondrial cytochrome c oxidase Va subunit mRNA         | -2.4   | -3.2  | -1.1 | -4.1  | -2.1    | 0.17     |
| D90086                                    | Hs.979    | PDBH    | Pyruvate dehydrogenase (EC 1.2.4.1) $\beta$ subunit gene                   | -2.1   | -2.2  | -1.2 | -2.0  | -1.8    |          |
| D61391                                    | Hs.77498  | PRPSAP1 | mRNA for phosphoribosylpyrophosphate synthetase-associated protein 39      | -2.4   | -2.0  | 1.1  | -2.1  | -1.6    |          |
| <b>Cell structure</b>                     |           |         |                                                                            |        |       |      |       |         |          |
| X00734                                    | Hs.108014 | TUBB5   | $\beta$ -tubulin gene (5- $\beta$ )                                        | -13.2  | -7.7  | -2.9 | -3.6  | -4.8    | 0.000057 |
| M24732                                    | Hs.184923 |         | Lamin-Like Protein                                                         | -9.5   | -3.1  | -5.6 | -3.6  | -4.5    |          |
| X65873                                    | Hs.149436 | KIF5B   | mRNA for kinesin (heavy chain)                                             | -3.1   | -2.2  | -4.3 | -7.7  | -3.5    | 0.000186 |
| J03778                                    | Hs.101174 | MAPT    | Microtubule-associated protein $\tau$ mRNA                                 | -5.8   | -2.6  | -1.5 | -2.6  | -2.5    |          |
| <b>Cell surface molecules / receptors</b> |           |         |                                                                            |        |       |      |       |         |          |
| D63412                                    | Hs.171963 | AQP4    | Human mRNA for aquaporin, complete cds                                     | -3.7   | -7.6  | -3.7 | -8.4  | -5.1    |          |
| U45955                                    | Hs.78361  | GPMB6B  | Neuronal membrane glycoprotein 6b mRNA                                     | -8.2   | -4.8  | -2.0 | -8.2  | -4.2    |          |
| U87460                                    | Hs.27747  | GPR37   | Putative endothelin receptor type B-like protein mRNA                      | -19.2  | -4.2  | -3.9 | -2.3  | -4.1    | 0.03     |
| X14766                                    | Hs.45740  | GABRA1  | Human mRNA for GABA-A receptor, $\alpha$ 1 subunit                         | -9.5   | -2.3  | -2.1 | -11.8 | -3.6    |          |
| X57830                                    | Hs.172744 | HTR2A   | Serotonin 5-HT2 receptor mRNA                                              | -3.5   | -3.5  | -3.5 | -3.5  | -3.5    |          |
| M80254                                    | Hs.173125 | PFIF    | H. sapiens cyclophilin isoform (hCyP3) mRNA, complete cds                  | -1.8   | -6.7  | -2.6 | -4.8  | -3.1    |          |
| U01691                                    | Hs.79274  | ANX5    | Human annexin V (ANX5) gene, 5'-untranslated region                        | -8.2   | -2.9  | -1.2 | -17.7 | -3.0    | 0.19     |
| U57971                                    | Hs.103124 | ATP2B3  | Human calcium ATPase isoform 3x/a mRNA, complete cds                       | -3.3   | -9.0  | -1.6 | -2.3  | -2.7    | 0.07     |
| AF010193                                  | Hs.100602 | MADH7   | Homo sapiens MAD-related gene SMAD7 (SMAD7) mRNA, complete cds.            | -5.9   | -2.4  | -1.4 | -5.9  | -2.7    |          |
| L02840                                    | Hs.84244  | KCNB1   | Potassium channel Kv2.1 mRNA                                               | -4.8   | -2.2  | -2.2 | -2.0  | -2.5    |          |
| X15376                                    | Hs.7195   | GABRG2  | Human mRNA for GABA-A receptor, $\gamma$ 2 subunit                         | -2.8   | -16.3 | 1.2  | -8.1  | -2.3    |          |
| J04027                                    | Hs.78546  | ATP2B1  | Human plasma membrane Ca <sup>2+</sup> pumping ATPase mRNA, complete cds   | -3.5   | -6.8  | 1.1  | -3.4  | -2.2    |          |
| <b>Immune related</b>                     |           |         |                                                                            |        |       |      |       |         |          |
| X95677                                    | 108981    | FCN1    | H. sapiens mRNA for ArgBP1B protein                                        | -5.9   | -5.9  | -1.9 | -5.9  | -3.9    | 0.15     |
| <b>Myelin related</b>                     |           |         |                                                                            |        |       |      |       |         |          |
| M54927                                    | Hs.1787   | PLP1    | Myelin Proteolipid Protein, Alt. Splice 2                                  | -13.3  | -4.1  | -3.5 | -4.0  | -4.7    | 0.000002 |
| S50017                                    | Hs.150741 | ONP     | 2',3'-cyclic nucleotide 3'-phosphodiesterase                               | -6.4   | -2.3  | -3.1 | -3.2  | -3.3    |          |
| M63623                                    | Hs.194772 | OMG     | Oligodendrocyte-myelin glycoprotein (OMGP) mRNA                            | -2.7   | -3.3  | -1.2 | -2.8  | -2.2    | 0.003889 |
| <b>Proteases and inhibitors</b>           |           |         |                                                                            |        |       |      |       |         |          |
| L19684                                    | Hs.159628 | PI4     | Kallistatin, Protease inhibitor 4                                          | -5.9   | -2.5  | -3.1 | -2.1  | -2.9    |          |
| X92106                                    | Hs.78943  | BLMH    | mRNA for bleomycin hydrolase                                               | -5.8   | -2.1  | -1.7 | -5.8  | -2.8    |          |
| Z81326                                    | Hs.78589  | PI12    | mRNA for protease inhibitor 12 (PI12; neuroserpin)                         | -7.1   | -2.6  | -1.1 | -3.7  | -2.4    | 0.14     |
| J04605                                    | Hs.73947  | PEPD    | Protease (immodipeptidase) mRNA                                            | -2.4   | -3.3  | -1.2 | -12.4 | -2.4    |          |
| M96859                                    | Hs.34074  | DPP6    | Dipeptidyl aminopeptidase like protein mRNA                                | -3.3   | -3.2  | -1.1 | -4.2  | -2.3    | 0.02     |
| D00762                                    | Hs.167106 | PSMA3   | mRNA for proteasome subunit HC8                                            | -5.5   | -2.9  | 1.2  | -5.5  | -2.1    |          |
| <b>Secreted products</b>                  |           |         |                                                                            |        |       |      |       |         |          |
| J00306                                    | Hs.12409  | SST     | Somatostatin I gene and flanks                                             | -3.4   | -3.2  | -2.4 | -3.5  | -3.0    | 0.000716 |
| L00354                                    | Hs.80247  | CCK     | Cholecystokinin (CCK) gene                                                 | -2.3   | -2.3  | 1.3  | -2.3  | -1.5    |          |
| <b>Signaling</b>                          |           |         |                                                                            |        |       |      |       |         |          |
| U90336                                    | 139033    | PEG3    | PEG3 mRNA, partial cds.                                                    | -7.9   | -7.9  | -7.9 | -7.9  | -7.9    |          |
| L36645                                    | Hs.73964  | EPHA4   | Receptor protein-tyrosine kinase (HEK8) mRNA                               | -6.2   | -20.0 | -2.2 | -20.0 | -5.6    |          |
| X03663                                    | Hs.174142 | CSF1R   | mRNA for c-fms proto-oncogene                                              | -4.2   | -4.2  | -4.2 | -4.2  | -4.2    |          |
| X63578                                    | Hs.81849  | PVALB   | Gene for parvalbumin                                                       | -4.3   | -3.0  | -3.8 | -4.8  | -3.9    | 0.007769 |
| X07109                                    | Hs.77202  | PRKCB1  | mRNA for protein kinase C (PKC) type $\beta$ II                            | -22.4  | -2.2  | -4.1 | -3.1  | -3.8    |          |
| X66533                                    | Hs.77890  | GUCY1B3 | Soluble guanylate cyclase small subunit mRNA                               | -13.8  | -8.1  | -1.2 | -13.8 | -3.7    |          |
| NM006366                                  | Hs.227526 | CAP2    | Adenylyl Cyclase-Associated Protein 2                                      | -10.1  | -10.1 | -1.3 | -9.1  | -3.7    |          |
| M33336                                    | Hs.183037 | PRKAR1A | cAMP-dependent protein kinase type I- $\alpha$ subunit (PRKAR1A) mRNA      | -6.3   | -5.0  | -1.4 | -16.3 | -3.6    | 0.02     |
| U81554                                    | Hs.231812 | CAMK2G  | CaM kinase II isoform mRNA                                                 | -5.7   | -5.7  | -2.1 | -2.3  | -3.2    |          |
| U73477                                    | Hs.76689  | PHAP1   | Acidic nuclear phosphoprotein pp32 mRNA                                    | -3.7   | -8.5  | -1.6 | -3.5  | -3.1    |          |
| L14778                                    | Hs.92     | PPP3CA  | Caimitudin-dependent protein phosphatase catalytic subunit (PPP3CA) mRNA   | -6.2   | -3.2  | -1.8 | -3.6  | -3.1    |          |
| U27768                                    | Hs.227571 | RGS4    | RGP4 mRNA                                                                  | -8.5   | -7.6  | 1.1  | -13.6 | -2.8    |          |
| X57346                                    | Hs.182238 | YWHAB   | mRNA for HS1 protein                                                       | -4.8   | -3.2  | -1.2 | -7.8  | -2.7    |          |

|                                    |           |              |                                                                                             |       |       |       |       |       |          |
|------------------------------------|-----------|--------------|---------------------------------------------------------------------------------------------|-------|-------|-------|-------|-------|----------|
| U66702                             | Hs.74624  | PTPRN2       | Phogrin mRNA                                                                                | -2.1  | -5.0  | -1.4  | -2.1  | -2.1  | 0.03     |
| M29870                             | Hs.250648 | RAC1         | Ras-Related C3 Botulinum Toxin Substrate                                                    | -4.4  | -5.5  | 1.3   | -4.1  | -2.1  |          |
| M18255                             | Hs.77202  | PRKCB1       | PRKACB gene (protein kinase C-β-2)                                                          | -2.5  | -2.3  | -1.1  | -2.2  | -1.8  | 0.13     |
| <b>Stress</b>                      |           |              |                                                                                             |       |       |       |       |       |          |
| L26336                             | Hs.75452  | HSPA2        | <b>Heat shock protein HSPA2 gene</b>                                                        | -7.8  | -2.4  | -3.0  | -2.8  | -3.2  | 0.000005 |
| L12723                             | Hs.90093  | HSPA4        | <b>Heat shock protein 70 (hsp70) mRNA</b>                                                   | -3.8  | -2.7  | -2.2  | -4.9  | -3.1  |          |
| L15189                             | Hs.3069   | HSPA9B       | Heat shock 70kDa protein 9B (mortalin-2)                                                    | -3.2  | -2.7  | 1.3   | -2.6  | -1.7  |          |
| <b>Transcription / translation</b> |           |              |                                                                                             |       |       |       |       |       |          |
| D82347                             | Hs.72981  | NEUROD1      | mRNA for NeuroD                                                                             | -4.8  | -7.2  | -7.2  | -7.2  | -6.4  | 0.18     |
| L08895                             | Hs.78995  | MEF2C        | <b>MADS/MEF2-family transcription factor (MEF2C) mRNA</b>                                   | -11.9 | -11.9 | -2.1  | -7.4  | -5.1  |          |
| U48213                             | Hs.155402 | DBP          | <b>D-site binding protein gene, promoter region</b>                                         | -7.6  | -7.6  | -2.4  | -7.6  | -4.9  |          |
| D76435                             | Hs.41154  | ZIC1         | mRNA for Zic protein                                                                        | -3.0  | -4.3  | -4.9  | -8.3  | -4.5  |          |
| D63135                             |           |              | mRNA for ETS-like 30 kDa protein                                                            | -8.1  | -4.3  | -3.3  | -3.5  | -4.2  | 0.03     |
| U29607                             | Hs.78935  | MNFEP        | <b>Methionine aminopeptidase mRNA</b>                                                       | -4.8  | -4.6  | -2.7  | -5.7  | -4.1  |          |
| D85131                             | Hs.7647   | MAZ          | mRNA for Myc-associated zinc-finger protein of human islet                                  | -5.3  | -4.2  | -1.8  | -5.3  | -3.4  | 0.001044 |
| U77396                             |           |              | TNFα inducible responsive element mRNA                                                      | -6.7  | -6.7  | -1.3  | -6.7  | -3.3  |          |
| M74719                             | Hs.75356  | TCF4         | SEF2-1B protein (SEF2-1B) mRNA                                                              | -11.0 | -2.5  | -1.7  | -6.1  | -3.2  |          |
| U00947                             | Hs.151604 | HNRPA1       | Heterogeneous nuclear ribonucleoprotein A1                                                  | -3.9  | -2.8  | -1.5  | -3.8  | -2.6  |          |
| X78136                             | Hs.63525  | PCBP2        | hnRNP-E2 mRNA                                                                               | -3.5  | -2.2  | -1.3  | -2.6  | -2.1  | 0.15     |
| L40357                             | Hs.77558  | TRIP7        | Thyroid receptor interactor (TRIP7) mRNA                                                    | -3.9  | -7.3  | 1.3   | -8.6  | -2.2  |          |
| X03689                             |           |              | mRNA fragment for elongation factor TU (N-terminus)                                         | -3.4  | -3.0  | -1.0  | -4.5  | -2.2  |          |
| U30825                             | Hs.77608  | SFRS9        | Splicing factor SFp30c mRNA                                                                 | -3.2  | -2.6  | -1.1  | -3.1  | -2.0  |          |
| D11094                             | Hs.61153  | PSMC2        | mRNA for MSS1                                                                               | -2.2  | -3.7  | 1.3   | -9.0  | -1.9  | 0.05     |
| D87735                             | Hs.158675 | RPL14        | mRNA for ribosomal protein L14                                                              | -2.3  | -2.4  | -1.0  | -3.1  | -1.8  | 0.16     |
| <b>Transport / secretion</b>       |           |              |                                                                                             |       |       |       |       |       |          |
| U18244                             | Hs.113602 | SLC1A6       | <b>Excitatory amino acid transporter 4 mRNA</b>                                             | -4.2  | -11.5 | -11.5 | -11.5 | -8.0  |          |
| L38951                             | Hs.180446 | KPNB1        | <b>Importin β subunit mRNA</b>                                                              | -12.2 | -3.5  | -5.3  | -12.2 | -6.3  | 0.01     |
| J03263                             | Hs.150101 | LAMP1        | <b>Lysosome-associated membrane glycoprotein (lamp A) mRNA</b>                              | -11.6 | -5.7  | -2.4  | -11.6 | -5.2  |          |
| Y00064                             | Hs.2281   | CHGB         | <b>mRNA for secretogranin I (chromogranin B)</b>                                            | -11.8 | -12.2 | -2.6  | -2.4  | -4.1  | 0.12     |
| M55047                             | Hs.154679 | SYT1         | Synaptotagmin mRNA                                                                          | -19.6 | -13.9 | -1.2  | -6.8  | -3.6  | 0.12     |
| M28215                             | Hs.73957  | RAB5A        | <b>GTP-binding protein (RAB5) mRNA</b>                                                      | -4.0  | -4.0  | -2.2  | -4.0  | -3.3  |          |
| M28213                             | Hs.78305  | RAB2         | GTP-binding protein (RAB2) mRNA                                                             | -6.4  | -6.4  | -1.3  | -4.7  | -3.2  |          |
| M28209                             | Hs.3642   | DKFZP564B163 | GTP-binding protein (RAB1) mRNA                                                             | -6.0  | -5.2  | -1.2  | -16.2 | -3.1  |          |
| U72761                             | Hs.113503 | KPNB3        | Karyopherin β 3 mRNA                                                                        | -3.9  | -2.6  | -1.7  | -3.9  | -2.7  |          |
| U03985                             | Hs.108802 | NSF          | N-Ethylmaleimide-Sensitive Factor                                                           | -7.1  | -3.7  | -1.1  | -4.7  | -2.6  |          |
| X12953                             | Hs.78305  | RAB2         | rab2 mRNA, YPT1-related and member of ras family                                            | -6.5  | -2.2  | -1.3  | -3.2  | -2.4  |          |
| J04982                             | Hs.2043   | ANT1         | Heart/skeletal muscle ATP/ADP translocator (ANT1) gene                                      | -2.9  | -5.0  | -1.0  | -5.5  | -2.4  |          |
| X58528                             | Hs.76781  | ABCD3        | PMP70 mRNA for a peroxisomal membrane protein                                               | -2.4  | -2.0  | -1.7  | -4.1  | -2.3  |          |
| M36205                             | Hs.255446 | VAMP2        | Synaptobrevin 2 (SYB2) gene                                                                 | -10.9 | -7.0  | 1.6   | -10.9 | -2.1  |          |
| D13988                             | Hs.56845  | GDI2         | rab GDI mRNA                                                                                | -3.0  | -2.3  | -1.0  | -2.9  | -1.9  |          |
| U24105                             | Hs.75887  | COPA         | Coatomer protein (HEPCOP) mRNA                                                              | -2.1  | -2.2  | -1.0  | -2.2  | -1.7  |          |
| <b>Unknown</b>                     |           |              |                                                                                             |       |       |       |       |       |          |
| M58459                             | Hs.180911 | RPS4Y        | <b>Ribosomal protein (RPS4Y) isoform mRNA</b>                                               | -12.6 | -12.6 | -12.6 | -10.9 | -12.1 | 0.01     |
| D31764                             | Hs.78436  | KIAA0064     | <b>mRNA for KIAA0064 gene</b>                                                               | -9.2  | -9.2  | -2.8  | -9.2  | -5.9  |          |
| U49188                             | Hs.76329  | TDE1         | Placenta (DIF33) mRNA                                                                       | -11.4 | -11.4 | -2.0  | -11.4 | -5.2  | 0.05     |
| U76189                             | Hs.61152  | EXTL2        | <b>EXTL3 mRNA</b>                                                                           | -5.3  | -5.3  | -2.4  | -5.3  | -4.1  | 0.04     |
| U60269                             | Hs.141034 |              | <b>Putative envelope protein; similar to Type A and Type B retroviruses, class II HERVs</b> | -3.3  | -4.4  | -2.5  | -4.4  | -3.5  |          |
| Y12711                             | Hs.90061  | HPR6.6       | mRNA for putative progesterone binding protein                                              | -12.4 | -12.4 | -1.1  | -7.3  | -3.4  | 0.02     |
| M55267                             | Hs.41846  |              | EV12 protein gene                                                                           | -9.8  | -9.8  | -1.1  | -9.8  | -3.2  |          |
| Z69915                             |           |              | <b>mRNA clone ICRFp507L1876</b>                                                             | -2.8  | -2.5  | -3.0  | -3.3  | -2.9  | 0.08     |
| AF009301                           | Hs.20141  | TEB4         | <b>TEB4 protein mRNA</b>                                                                    | -2.1  | -7.3  | -2.3  | -3.5  | -3.0  | 0.1      |
| Y12478                             | Hs.198308 | WFB          | mRNA for CHD5 protein                                                                       | -11.7 | -4.8  | 1.0   | -11.7 | -2.8  |          |
| M34677                             | Hs.83363  | DXS522E      | Nested gene protein gene                                                                    | -2.5  | -5.8  | -1.3  | -2.7  | -2.3  | 0.09     |
| Z93784                             |           |              | DNA sequence from PAC 398C22 on chromosome 22q11.2-qter                                     | -7.4  | -4.1  | 1.2   | -7.4  | -2.3  |          |
| D87447                             | Hs.47313  | KIAA0258     | mRNA for KIAA0258 gene                                                                      | -2.4  | -6.5  | -1.4  | -2.0  | -2.3  | 0.06     |
| D87120                             | Hs.29882  | GS3786       | Cancellous bone osteoblast mRNA for GS3786                                                  | -2.2  | -4.9  | -1.5  | -2.3  | -2.2  |          |
| M74088                             | Hs.75081  | APC          | APC gene mRNA                                                                               | -7.3  | -7.3  | 1.3   | -3.5  | -2.2  |          |
| Z48042                             | Hs.255739 | M11S1        | mRNA encoding GPI-anchored protein p137                                                     | -3.1  | -2.3  | -1.2  | -2.6  | -2.0  |          |
| D14659                             | Hs.154387 | KIAA0103     | mRNA for KIAA0103 gene                                                                      | -2.2  | -2.8  | -1.2  | -2.1  | -1.9  |          |
| U02556                             | Hs.75307  | TCTE1L       | RP3 mRNA                                                                                    | -2.9  | -2.0  | -1.2  | -2.1  | -1.8  | 0.07     |
